# Supplementary material for: In Vitro Activities of Dithiocarbamate Derivatives against Echinococcus multilocularis Metacestode Vesicles
Source: MDPI journal article supplement (doi:10.3390/tropicalmed8120517), 2023-12-12
Supplement: s1 [file s1]

Table S1. Structures and activity of disulfiram and dithiocarbamate derivatives.

| Compound    | Structure                                                                            | Molecular weight [g/mol] | PGI assay  |
|-------------|--------------------------------------------------------------------------------------|--------------------------|------------|
| Disulfiram  | 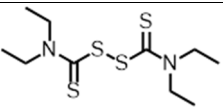   | 296.54                   | Not active |
| Schl-32.088 |    | 284.39                   | Not active |
| Schl-32.118 |    | 317.49                   | Not active |
| Schl-32.158 |    | 300.39                   | Active     |
| Schl-32.175 |   | 337.46                   | Not active |
| Schl-32.177 |  | 462.63                   | Not active |
| Schl-32.189 |  | 292.46                   | Not active |
| Schl-32.278 |  | 424.56                   | Not active |
| Schl-32.280 |  | 407.46                   | Not active |
| Schl-32.282 |  | 444.52                   | Not active |
| Schl-32.291 |  | 401.54                   | Not active |
| Schl-32.292 |  | 434.64                   | Not active |

|             |                                                                                      |        |            |
|-------------|--------------------------------------------------------------------------------------|--------|------------|
| Schl-32.294 | 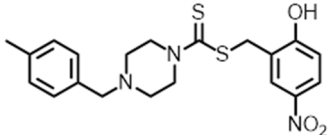   | 417.54 | Active     |
| Schl-32.304 |    | 373.54 | Not active |
| Schl-32.308 |    | 412.52 | Not active |
| Schl-32.309 |    | 357.58 | Not active |
| Schl-32.311 |    | 404.59 | Not active |
| Schl-32.312 |   | 397.51 | Not active |
| Schl-32.314 |  | 377.52 | Not active |
| Schl-32.315 |  | 413.51 | Active     |
| Schl-32.317 |  | 450.57 | Not active |
| Schl-32.320 |  | 366.95 | Not active |
| Schl-32.322 |  | 349.85 | Not active |
| Schl-32.324 |  | 386.92 | Not active |
| Schl-32.325 |  | 341.92 | Not active |

|             |                                                                                      |        |            |
|-------------|--------------------------------------------------------------------------------------|--------|------------|
| Schl-32.329 | 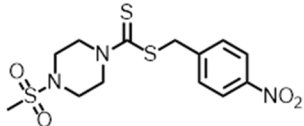   | 375.49 | Not active |
| Schl-32.330 |    | 437.56 | Not active |
| Schl-32.337 |    | 468.59 | Not active |
| Schl-32.347 |    | 430.97 | Not active |
| Schl-32.351 |    | 382.50 | Not active |
| Schl-32.354 |   | 484.59 | Not active |
| Schl-32.360 |  | 401.52 | Not active |
| Schl-32.361 |  | 404.53 | Not active |
| Schl-32.363 |  | 389.51 | Not active |
| Schl-32.364 |  | 417.57 | Not active |
| Schl-33.004 |  | 391.5  | Not active |
| Schl-33.071 |  | 443.6  | Not active |
| Schl-33.086 |  | 510.62 | Not active |

|             |                                                                                      |        |            |
|-------------|--------------------------------------------------------------------------------------|--------|------------|
| Schl-33.087 | 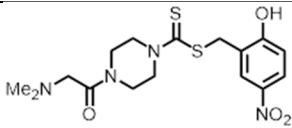   | 512.52 | Not active |
| Schl-33.102 |    | 417.51 | Not active |
| Schl-33.108 |    | 453.55 | Not active |
| Schl-33.111 |    | 420.52 | Not active |
| Schl-33.113 |    | 524.53 | Not active |
| Schl-33.290 |    | 462.62 | Not active |
| Schl-33.535 |   | 459.57 | Not active |
| Schl-33.580 |  | 462.60 | Not active |
| Schl-33.590 |  | 424.56 | Not active |
| Schl-33.633 |  | 459.59 | Active     |
| Schl-33.652 |  | 478.62 | Active     |
| Schl-33.710 |  | 371.49 | Not active |
| Schl-33.726 |  | 561.69 | Not active |

|             |                                                                                                                                                            |        |            |
|-------------|------------------------------------------------------------------------------------------------------------------------------------------------------------|--------|------------|
| Schl-33.742 | 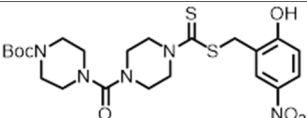 <chem>CC1(C)CC(C)(C)N1C(=O)N2CCN(CC2)SCC3=CC=C(C=C3)[N+](=O)[O-]</chem> | 525.64 | Not active |
|-------------|------------------------------------------------------------------------------------------------------------------------------------------------------------|--------|------------|
